# Supplementary material for: In-Hospital Patient Education Markedly Reduces Alcohol Consumption after Alcohol-Induced Acute Pancreatitis
Source: MDPI journal article supplement (doi:10.3390/nu14102131), 2022-05-20
Supplement: s1 [file s1]

**Table S1.** Participating centres.

| <b>Centres</b>                                                                            | <b>Patient number</b> | <b>%</b> |
|-------------------------------------------------------------------------------------------|-----------------------|----------|
| Department of Translational Medicine, University of Pécs                                  | 73                    | 73.74    |
| Department of Gastroenterology, Szent György University Teaching Hospital of Fejér County | 19                    | 19.19    |
| Department of Gastroenterology, University of Debrecen                                    | 7                     | 7.07     |

**Table S2.** Data quality.

|                                 | <b>N</b>  | <b>Reported data</b> | <b>%</b>  |
|---------------------------------|-----------|----------------------|-----------|
| Age                             | 99        | 99                   | 100       |
| Gender                          | 99        | 99                   | 100       |
| Severity                        | 99        | 97                   | 98        |
| Length of hospitalization       | 99        | 99                   | 100       |
| Previous RAP                    | 99        | 99                   | 100       |
| Chronic pancreatitis            | 99        | 99                   | 100       |
| Hypertriglyceridaemia           | 99        | 88                   | 89        |
| Alcohol consumption (frequency) | 99        | 99                   | 100       |
| Alcohol consumption (amount)    | 99        | 95                   | 96        |
| Admission GGT level             | 99        | 99                   | 100       |
| Discharge GGT level             | 99        | 93                   | 94        |
| 1-month GGT level               | 99        | 99                   | 100       |
| Admission MCV level             | 99        | 99                   | 100       |
| Discharge MCV level             | 99        | 94                   | 95        |
| 1-month MCV level               | 99        | 99                   | 100       |
| Self-reporting                  | 99        | 95                   | 96        |
| <b>Total</b>                    | <b>99</b> | <b>97</b>            | <b>98</b> |

GGT – gamma-glutamyltransferase; MCV – mean corpuscular volume.

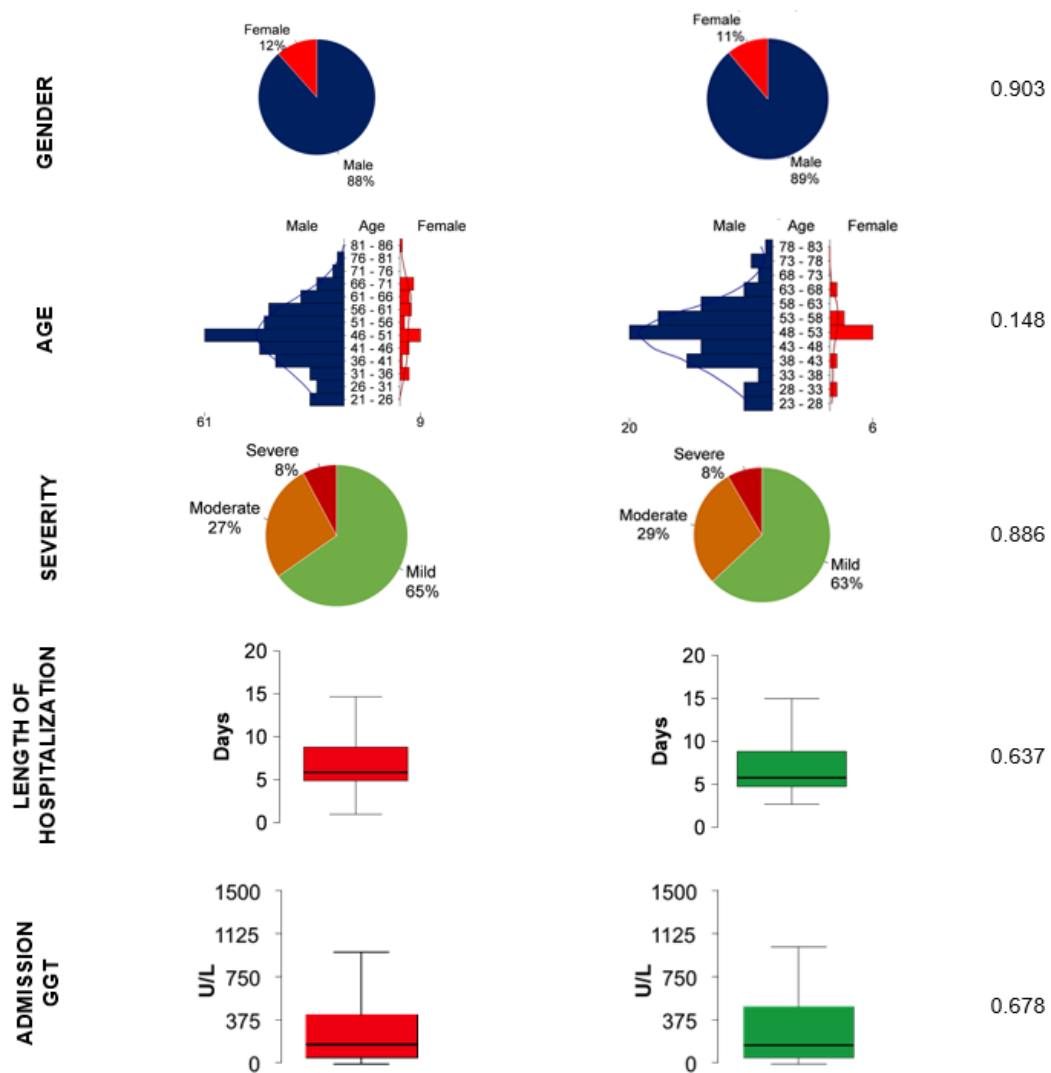

**Figure S1.** Representiveness. Comparison of basic characteristics (age, gender, severity, length of hospitalization, admission GGT level) of all patients with alcohol-induced acute pancreatitis and enrolled patients. There is no significant difference in terms of basic characteristics between the two groups.
